# Supplementary material for: Age-specific differences in gait domains and global cognitive function in older women: gait characteristics based on gait speed modification
Source: PeerJ. 2020 Mar 16;8:e8820. doi: 10.7717/peerj.8820 (PMC7081786; doi:10.7717/peerj.8820)
Supplement: Supplemental Information 1 [file peerj-08-8820-s001.xlsx]

## Sheet: Aged 65-69
Legend:	Slower: slower walking speed	Preferred: preferred walking speed	Faster: faster walking speed
Number	Age classify	Slower Cadence	Preferred Cadence	Faster Cadence	Slower walking speed	Preferred walking speed	Faster walking speed	Slower walking speed_Normalized	Preferred walking speed_Normalized	Faster walking speed_Normalized	Slower Stride Length	Preferred Stride Length	Faster Stride Length	Slower Stride Length Coefficient of Variance	Preferred Stride Length Coefficient of Variance	Faster Stride Length Coefficient of Variance	Slower Stride Length Normalized	Preferred Stride Length_Normalized	Faster Stride Length Normalized	Slower Left Step Length	Preferred Left Step Length	Faster Left Step Length	Slower Left Step Length Coefficient of Variance	Preferred Left Step Length Coeffient of Variance	Faster Left Step Length Coefficient of Variance	Slower Left Step Length Normalized	Preferred Left Step Length Normalized	Faster Left Step Length Normalized	Slower Right Step Length	Preferred Right Step Length	Faster Right Step Length	Slower Right Step Length Coefficient of Variance	Preferred Right Step Length Coefficient of Variance	Faster Right Step Length Coefficient of Variance	Slower Right Step Length Normalized	Preferred Right Step Length_Normalized	Faster Right Step Length Normalized	Slower Left Single Support	Preferred Left Single Support	Faster Left Single Support	Slower Right Single Support	Preferred Right Single Support	Faster Right Single Support	Slower Left Double Support	Preferred Left Double Support	Faster Left Double Support	Slower Right Double Support	Preferred Right Double Support	Faster Right Double Support
1	1	105	119	122	0.8056	1.1111	1.3333	0.539224	0.743708	0.892436	0.9179	1.1363	1.3044	2.10409	2.29925	1.90469	0.614391	0.760576	0.873092	0.4598	0.5674	0.6528	1.1861	0.8138	0.9004	0.307764	0.379786	0.436948	0.459	0.5681	0.6522	1.1987	1.1757	0.9317	0.307229	0.380254	0.436546	37.4945	40.3394	42.383	38.7889	41.0039	42.0784	23.7845	18.6031	15.5745	23.6093	18.7337	15.4894
2	1	105	120	128	1.0556	1.3333	1.6667	0.683236	0.862977	1.07877	1.226	1.3578	1.5546	1.89362	1.31945	2.0994	0.793528	0.878835	1.00621	0.6141	0.6789	0.775	0.9375	0.6401	0.9045	0.397476	0.439417	0.501618	0.613	0.6789	0.7773	1.0996	0.6719	0.9791	0.396764	0.439417	0.503107	36.9552	39.5254	41.1535	39.2374	40.9984	42.3002	23.8797	19.4763	16.4223	23.6955	19.4763	16.7155
3	1	123	127	140	0.9444	1.1111	1.4167	0.638108	0.750743	0.95723	0.9201	1.0412	1.2133	2.45425	1.62727	1.56698	0.621689	0.703514	0.819797	0.4595	0.5212	0.6071	1.4054	0.7522	0.766	0.310473	0.352162	0.410203	0.46	0.5206	0.6066	1.1956	0.7624	0.671	0.310811	0.351757	0.409865	40.6165	41.3166	42	39.9784	41.3057	43.3695	19.3618	17.4295	14.6667	19.47	17.3041	14.5833
4	1	110	113	132	1	1.0556	1.4167	0.653595	0.689935	0.925948	1.0825	1.1169	1.3044	1.91843	1.98304	1.563	0.707516	0.73	0.852549	0.5409	0.5591	0.6522	1.5634	1.2682	0.6343	0.353529	0.365425	0.426275	0.5413	0.5585	0.6522	1.0383	1.0491	0.7195	0.353791	0.365033	0.426275	37.0884	37.7581	40.1003	38.9145	38.5115	41.3534	23.9746	23.7758	18.5464	24.0324	23.6578	18.5464
5	1	99	108	129	1	1.25	1.5278	0.647249	0.809061	0.988867	1.225	1.3802	1.4153	2.55829	1.63101	1.61254	0.79288	0.893333	0.916052	0.6104	0.6896	0.7056	1.1567	1.0865	0.8055	0.395081	0.446343	0.456699	0.6125	0.6901	0.7076	1.567	0.9004	0.7469	0.39644	0.446667	0.457994	38.7361	40.6344	42.815	40	40.6038	42.002	21.1235	18.7311	15.0591	21.4745	18.8066	15.3543
6	1	110	112	121	1.0556	1.1667	1.5278	0.658105	0.727369	0.952494	1.1653	1.2385	1.5014	1.86526	2.58238	1.50877	0.726496	0.772132	0.936035	0.5837	0.6179	0.7521	1.1804	1.1345	0.6524	0.363903	0.385224	0.46889	0.5827	0.6192	0.7507	1.0296	1.3707	0.7413	0.363279	0.386035	0.468017	39.1802	39.2157	40.9972	37.9227	39.058	40.148	22.9656	21.6412	18.9289	22.7848	21.8591	18.7442
7	1	106	122	138	1.1667	1.1667	1.6667	0.780401	0.780401	1.11485	1.3201	1.1517	1.4349	1.72791	3.09712	2.12772	0.88301	0.770368	0.959799	0.6605	0.5742	0.7174	1.0406	1.7083	0.9159	0.441806	0.38408	0.479866	0.6601	0.5758	0.7174	0.9776	1.5286	0.9159	0.441538	0.385151	0.479866	39.4701	41.0015	41.8163	38.4092	39.7974	40.5491	22.1467	19.0856	17.6346	22.0788	19.3759	17.6346
8	1	99	114	122	1.0556	1.25	1.4167	0.673644	0.797703	0.904084	1.2626	1.3433	1.3671	3.70338	2.74632	1.91546	0.805743	0.857243	0.872431	0.6341	0.674	0.6835	2.3927	1.6739	0.9682	0.404659	0.430121	0.436184	0.6313	0.6716	0.6835	2.2148	1.4756	0.9242	0.402872	0.42859	0.436184	39.5647	41.1555	43.0052	39.6785	41.2312	42.5734	20.9347	17.7603	14.4214	20.4866	17.4037	14.4214
9	1	92	102	126	0.8889	1.1667	1.5556	0.54367	0.713578	0.951437	1.1644	1.3533	1.4711	3.44796	2.95516	2.58132	0.712171	0.827706	0.899755	0.5818	0.6716	0.7389	1.6651	1.5091	1.4393	0.355841	0.410765	0.451927	0.5822	0.6767	0.7356	2.2583	1.7139	1.2206	0.356086	0.413884	0.449908	38.1971	39.7394	40.7519	38.3206	39.5474	42.2961	23.453	20.4126	17.1429	23.5294	21.1726	16.6917
10	1	104	117	133	1.0833	1.2778	1.3889	0.736939	0.869252	0.94483	1.2591	1.319	1.25	1.80369	2.08168	2.07868	0.856531	0.897279	0.85034	0.6301	0.6588	0.625	1.1547	1.0915	0.75	0.428639	0.448163	0.42517	0.6295	0.6595	0.625	1.0482	1.0744	0.9354	0.428231	0.448639	0.42517	38.9685	40.9483	41.6667	40.4398	40.9042	41.3889	20.6304	18.1034	16.9444	20.5349	18.2112	16.9444
11	1	104	118	137	1	1.1667	1.5556	0.657462	0.767061	1.02275	1.177	1.1926	1.3553	3.89439	3.31843	2.0239	0.773833	0.784089	0.891059	0.5855	0.6008	0.6747	2.4336	2	0.4841	0.384944	0.395003	0.44359	0.5885	0.5963	0.6776	2.2918	1.696	0.8817	0.386917	0.392045	0.445496	37.8309	39.1586	41.4986	38.5726	40.4348	42.1808	23.3988	20.712	16.1383	23.9112	19.9569	16.5706
12	1	123	126	137	1.0833	1.1667	1.3889	0.747103	0.804621	0.957862	1.0627	1.0978	1.2299	1.33652	1.38159	1.51617	0.732897	0.757103	0.848207	0.5303	0.5478	0.6142	0.6199	0.522	0.6285	0.365724	0.377793	0.423586	0.5313	0.5489	0.615	0.6556	0.65	0.6713	0.366414	0.378552	0.424138	38.7187	38.9776	40.3266	38.7396	38.7885	41.5307	22.4698	22.1512	18.0905	22.6555	22.3642	18.2161
13	1	117	125	150	1.2778	1.5556	2	0.851867	1.03707	1.33333	1.3374	1.4756	1.5767	2.58732	1.31292	1.35371	0.8916	0.983733	1.05113	0.6701	0.7378	0.79	1.1653	0.6227	0.5774	0.446733	0.491867	0.526667	0.6687	0.7378	0.7883	1.354	0.6227	0.5336	0.4458	0.491867	0.525533	39.1949	40.3614	41.9831	39.9151	41.1145	42.2833	20.9746	18.5241	15.8228	20.7627	18.5241	15.6118
14	1	116	120	136	1.0833	1.1667	1.5556	0.754913	0.813031	1.08404	1.1256	1.1818	1.3475	3.11709	2.42018	3.50809	0.78439	0.823554	0.939024	0.5623	0.5933	0.6718	1.4799	1.95	1.7489	0.391847	0.413449	0.468153	0.5628	0.5909	0.6738	1.6194	1.2258	1.5194	0.392195	0.411777	0.469547	38.632	39.0364	40.2315	37.8248	38.3021	40.1154	23.5067	22.8122	19.5369	23.6031	22.4189	19.8263
15	1	119	127	137	1.1667	1.3889	1.75	0.78302	0.932148	1.1745	1.2004	1.3299	1.55	1.48073	1.01115	1.89474	0.805638	0.89255	1.04027	0.6041	0.6658	0.7775	1.0031	1.0136	0.7284	0.405436	0.446846	0.521812	0.6002	0.6649	0.775	0.7617	0.4841	0.8391	0.402819	0.446242	0.520134	38.1974	40.2868	42.283	38.9849	40.6005	42.0968	23.0687	19.1656	15.7556	22.4249	19.0352	15.4341
16	1	112	119	142	1.1667	1.2778	2	0.767566	0.840658	1.31579	1.2425	1.2874	1.6733	2.73764	1.28931	1.91072	0.817434	0.846974	1.10086	0.6205	0.6453	0.84	1.5799	0.6614	0.7638	0.408224	0.424539	0.552632	0.6213	0.6437	0.8367	1.4577	0.6495	0.7993	0.40875	0.423487	0.550461	39.6005	40.099	42.6587	39.7887	40.4467	43.6255	20.564	19.5545	13.8889	20.6816	19.3069	13.4921
17	1	92	104	120	0.8333	0.9444	1.2778	0.53212	0.603065	0.815964	1.0705	1.0767	1.2835	1.70428	3.37439	1.25152	0.683589	0.687548	0.819604	0.5356	0.5383	0.6424	1.1153	2.0125	1.1574	0.342018	0.343742	0.410217	0.5352	0.5383	0.6417	1.0947	1.9235	0.6285	0.341762	0.343742	0.40977	36.4215	37.2807	39.6685	37.2258	38.0702	38.9381	26.3791	24.6491	21.4365	26.3083	24.6491	21.326
18	1	85	102	135	0.6111	0.8889	1.2778	0.408216	0.593788	0.853574	0.8577	1.0244	1.127	6.06725	3.47317	1.95071	0.572946	0.684302	0.752839	0.428	0.5096	0.5622	5.6457	2.1344	0.8062	0.285905	0.340414	0.375551	0.4289	0.5122	0.5635	4.2578	2.0013	0.8602	0.286506	0.342151	0.37642	34.7272	36.7006	38.75	36.3868	38.3948	41.61	28.8118	24.7093	19.5455	29.0158	25.218	19.7727
19	1	117	125	145	1.0833	1.2778	1.5556	0.7222	0.851867	1.03707	1.1288	1.2471	1.2969	2.8404	1.78652	1.57971	0.752533	0.8314	0.8646	0.5628	0.6216	0.6514	1.1927	0.6344	0.7395	0.3752	0.4144	0.434267	0.5644	0.6236	0.6485	1.4799	0.8718	0.6585	0.376267	0.415733	0.432333	39.076	39.5683	41.194	38.3877	39.6516	40.9295	22.4254	20.6578	18.0597	22.7141	20.9661	17.6119
20	1	86	109	115	0.8889	1.2778	1.5556	0.560467	0.805675	0.980832	1.2652	1.4407	1.597	5.44216	2.41884	1.83672	0.79773	0.908386	1.00694	0.6346	0.7243	0.7959	3.6498	1.6382	0.986	0.400126	0.456683	0.501828	0.6326	0.7203	0.7985	3.873	1.3636	0.9428	0.398865	0.454161	0.503468	39.4553	40.9041	42.8339	39.9688	40.7982	41.8831	20.7004	18.5226	15.1466	20.3891	17.9713	15.4723
21	1	117	117	128	1.1667	1.2778	1.5556	0.763048	0.83571	1.0174	1.2198	1.3017	1.4836	1.43375	1.79925	1.27753	0.797776	0.851341	0.970307	0.6086	0.6501	0.7399	0.9428	0.857	0.4635	0.398038	0.42518	0.483911	0.6099	0.6509	0.7418	0.7495	0.9164	0.6092	0.398888	0.425703	0.485154	39.6166	40.4177	42.0499	40.7014	40.9816	43.1193	19.5953	18.5504	14.7175	19.8083	18.6732	14.9803
22	1	110	119	131	0.9444	1.0833	1.2778	0.60929	0.698903	0.824387	1.057	1.105	1.1926	2.14121	1.24006	1.6752	0.681935	0.712903	0.769419	0.5277	0.5525	0.5949	1.4737	0.6325	0.7974	0.340452	0.356452	0.383806	0.5285	0.5525	0.5963	1.1982	0.6325	0.7817	0.340968	0.356452	0.38471	37.4348	38.8235	39.9761	37.5279	39.2157	39.6429	24.9814	21.9608	20.2864	25.1305	21.9608	20.5251
23	1	90	104	125	0.8333	0.9444	1.3889	0.564949	0.640271	0.941627	1.0947	1.1084	1.358	7.31046	5.21797	2.49491	0.742169	0.751458	0.920678	0.5515	0.5525	0.6775	4.2761	2.6285	0.8854	0.373898	0.374576	0.459322	0.5473	0.5542	0.679	4.8019	3.062	1.2197	0.371051	0.375729	0.460339	39.1484	40.9479	41.5718	39.308	37.8002	40.3409	21.8407	21.1344	17.9954	21.0852	21.4452	18.2232
24	1	102	112	125	0.8889	1	1.2778	0.608836	0.684932	0.875205	1.0546	1.073	1.2082	8.11069	5.17307	3.83308	0.722329	0.734932	0.827534	0.5321	0.534	0.6055	5.086	2.6058	1.8823	0.364452	0.365753	0.414726	0.5273	0.5365	0.6041	4.8113	2.7753	1.8122	0.361164	0.367466	0.413767	38.5725	39.2322	40.68	38.7739	38.3038	40.5405	23.0068	22.2846	18.8746	22.0957	22.7528	18.6401
25	1	117	119	136	1.2778	1.3889	1.75	0.863378	0.938446	1.18243	1.3449	1.4375	1.5575	1.8853	2.51026	0.648764	0.908716	0.971284	1.05236	0.6732	0.7188	0.7758	0.7474	1.199	0.6236	0.454865	0.485676	0.524189	0.6724	0.7188	0.7788	0.9922	1.299	0.2887	0.454324	0.485676	0.526216	39.3832	41.3043	42.2932	38.1235	39.4928	40.2622	22.5386	19.2029	17.2932	22.4199	19.2029	17.6692
26	1	87	119	148	0.9444	1.2778	1.75	0.60929	0.824387	1.12903	1.2892	1.3257	1.4225	1.71797	1.34161	1.08334	0.831742	0.85529	0.917742	0.6458	0.6644	0.71	1.4307	1.1726	0.4949	0.416645	0.428645	0.458065	0.6446	0.6628	0.7113	1.1726	0.696	0.4403	0.415871	0.427613	0.458903	39.5795	40.8654	42.7817	39.7436	41.3253	42.7065	20.7495	17.9087	14.4366	20.5667	17.6683	14.6127
27	1	82	105	124	0.8889	1.2778	1.5556	0.558004	0.802134	0.976522	1.3343	1.4512	1.5311	5.03888	2.29884	2.02164	0.837602	0.910986	0.961142	0.6686	0.7256	0.7656	3.1279	1.7496	1.1294	0.419711	0.455493	0.480603	0.6672	0.7256	0.7656	3.7819	1.3054	0.9949	0.418832	0.455493	0.480603	37.74	39.8742	41.9448	36.5655	38.4906	41.2192	25.7755	21.6352	16.836	25.5539	21.6352	16.836
28	1	121	126	142	1.3889	1.3889	1.75	0.922857	0.922857	1.16279	1.4045	1.3611	1.475	2.06471	2.3381	2.95519	0.933223	0.904385	0.980066	0.7023	0.678	0.7338	0.8077	0.9333	1.2372	0.466645	0.450498	0.487575	0.7023	0.6806	0.7375	1.044	1.1456	1.2454	0.466645	0.452226	0.490033	41.1619	41.7414	44.4634	41.4091	42.4745	44.5763	17.4289	15.621	10.7325	17.4289	16.0051	11.2436
29	1	106	118	132	1.0833	1.2778	1.5556	0.759677	0.896073	1.09088	1.2543	1.3353	1.4622	3.20007	1.3533	1.88604	0.879593	0.936396	1.02539	0.6253	0.6676	0.7289	1.5654	0.5	0.8748	0.438499	0.468163	0.51115	0.6271	0.6676	0.7311	1.8526	0.7071	0.8864	0.439762	0.468163	0.512693	38.7873	40.1914	41.9207	38.0038	39.4737	41.3374	23.0991	20.3349	16.6159	23.3879	20.3349	16.9207
30	1	115	125	142	1.2778	1.2778	1.75	0.787307	0.787307	1.07825	1.356	1.2426	1.505	1.59348	1.43133	1.52244	0.83549	0.765619	0.927295	0.6772	0.6189	0.7538	0.75	0.583	0.4165	0.417252	0.381331	0.464449	0.678	0.6213	0.7525	0.8455	0.696	0.6547	0.417745	0.38281	0.463648	39.2689	40.5161	41.4594	39.2226	39.3316	43.0233	21.4623	20	15.5887	21.5802	20.3871	15.4229
31	1	107	118	144	1.2778	1.3889	1.75	0.846225	0.919801	1.15894	1.4104	1.3948	1.4575	1.86433	2.43077	1.05732	0.93404	0.923709	0.965232	0.7044	0.6994	0.7275	0.7806	1.2454	0.4949	0.46649	0.463179	0.481788	0.7052	0.6974	0.7288	1.0289	1.2206	0.4403	0.46702	0.461854	0.482649	39.0023	40	41.5808	39.6376	40.5405	41.8525	21.3152	19.5745	16.4948	21.4286	19.2908	16.6667
32	1	114	117	135	1.1667	1.1667	1.5556	0.742176	0.742176	0.989567	1.212	1.1939	1.3844	1.39455	1.52788	2.24733	0.770992	0.759478	0.880662	0.6054	0.5982	0.6889	0.8089	0.8203	1.0973	0.385115	0.380534	0.438232	0.606	0.5969	0.6922	0.7244	0.7817	1	0.385496	0.379707	0.440331	38.758	38.6782	40.6452	39.1444	39.1965	41.252	22.0557	22.2102	17.9032	22.1627	21.9935	18.3871
33	1	104	118	142	0.8889	1.1667	1.3889	0.584803	0.767566	0.91375	1.0247	1.183	1.1929	2.89112	2.46358	2.65753	0.674145	0.778289	0.784803	0.5115	0.5903	0.598	1.63	1.4629	1.1413	0.336513	0.388355	0.393421	0.5123	0.5915	0.5965	1.6664	1.249	1.1413	0.337039	0.389145	0.392434	37.5197	39.4269	40.129	39.511	40.927	42.1734	22.9068	19.5652	17.8065	23.0648	19.7628	17.5484
34	1	118	129	152	1.1667	1.3889	1.75	0.766054	0.91195	1.14905	1.1926	1.3142	1.3956	3.01624	4.57432	6.86094	0.78306	0.862902	0.916349	0.5956	0.6623	0.712	1.279	2.0907	3.0714	0.39107	0.434865	0.467498	0.5963	0.6571	0.6978	1.5416	2.1642	2.7358	0.39153	0.431451	0.458175	45.4842	46.2647	47.0046	41.7391	43.3289	45.1411	12.7312	10.7471	8.7558	12.84	9.9607	6.7588
35	1	114	130	152	1.1667	1.5556	2	0.730557	0.974076	1.25235	1.2289	1.4178	1.5857	1.79016	1.89397	1.29936	0.769505	0.88779	0.992924	0.6144	0.7089	0.7929	0.9129	0.5624	0.4403	0.384721	0.443895	0.496493	0.6144	0.7089	0.7929	0.9428	0.8631	0.5151	0.384721	0.443895	0.496493	40.2954	42.6332	44.1441	40.5063	42.3197	43.7838	19.1983	15.047	12.0721	19.1983	15.047	12.0721
36	1	98	123	150	0.9444	1.3889	2	0.625017	0.919193	1.32363	1.1673	1.3924	1.5467	1.95514	1.08696	2.19784	0.772535	0.921509	1.02363	0.5823	0.6962	0.7767	1.7614	0.5995	0.9428	0.385374	0.460754	0.51403	0.5837	0.6962	0.7733	1.2083	0.5449	0.8498	0.3863	0.460754	0.51178	37.9562	40.6484	45.0644	37.945	40.0249	44.3966	24.0065	19.3267	10.7296	24.2498	19.3267	10.3004
37	1	92	116	130	0.8889	1.2778	1.75	0.565818	0.813367	1.11394	1.1368	1.3624	1.6013	4.35278	2.19648	1.37515	0.723616	0.867218	1.01929	0.5684	0.682	0.8035	3.312	1.0232	0.7312	0.361808	0.434118	0.511458	0.5684	0.6812	0.8006	2.7833	1.1709	0.6292	0.361808	0.433609	0.509612	36.8375	39.6956	41.7423	35.795	39.6249	42.623	27.3675	20.726	15.7895	27.3675	20.6089	15.4265
38	1	110	118	144	1.0833	1.2778	1.75	0.731959	0.863378	1.18243	1.1873	1.3076	1.48	3.26943	2.11107	1.98436	0.80223	0.883514	1	0.5958	0.6531	0.7438	1.7889	0.6573	0.6547	0.402568	0.441284	0.502568	0.5937	0.6538	0.74	1.7917	1.0801	0.8391	0.401149	0.441757	0.5	39.2727	40.4348	43.6975	39.5073	40.3909	43.4122	21.3636	19.1304	13.1092	21	19.2391	12.605
39	1	89	111	123	0.8333	1.0833	1.3889	0.54393	0.707115	0.906593	1.105	1.1905	1.3351	3.45906	1.98643	1.6805	0.721279	0.777089	0.871475	0.55	0.594	0.6684	2.429	1.5811	0.7806	0.359008	0.387728	0.436292	0.5525	0.5952	0.6675	2.2935	1.0915	0.8077	0.36064	0.388512	0.435705	37.3485	39.4124	40.9091	38.4615	40.4449	42.2627	24.0152	20.0608	16.8831	24.4697	20.2634	16.7532
40	1	96	121	139	1	1.5556	1.5556	0.666667	1.03707	1.03707	1.2411	1.5692	1.3778	3.9917	1.52269	1.33002	0.8274	1.04613	0.918533	0.6211	0.7826	0.6889	2.5362	0.7474	0.6468	0.414067	0.521733	0.459267	0.6206	0.7846	0.6889	2.4771	0.768	0.589	0.413733	0.523067	0.459267	38.3721	40.2484	40.9677	39.3912	39.2813	41.6129	22.2719	20.3727	17.4194	22.1825	20.6211	17.4194
41	1	119	129	156	1.0833	1.3889	1.75	0.7222	0.925933	1.16667	1.0996	1.2639	1.33	3.50398	0.951648	1.86079	0.733067	0.8426	0.886667	0.5509	0.6328	0.665	1.6439	0.4635	0.4629	0.367267	0.421867	0.443333	0.5498	0.6319	0.665	1.7783	0.433	0.7071	0.366533	0.421267	0.443333	40.0197	41.1523	43.2331	40.0985	41.6209	44.1729	19.9607	17.284	12.594	19.764	17.1468	12.594
42	1	81	97	122	0.6667	0.8889	1.5556	0.415131	0.553487	0.968618	0.9889	1.0889	1.5578	3.35211	3.60017	2.69159	0.615753	0.67802	0.969988	0.4964	0.5418	0.7778	3.5559	2.1266	1.1339	0.309091	0.33736	0.484309	0.4944	0.5444	0.7789	2.4861	2.2051	1.3477	0.307846	0.338979	0.484994	36.2059	38.5562	42.4286	37.3034	38.3673	41.9401	26.6368	22.8876	15.5714	26.2451	23.3798	15.7143
43	1	110	118	127	1.0833	1.2778	1.3889	0.714578	0.842876	0.916161	1.2085	1.319	1.3108	1.53007	1.56727	1.49263	0.797164	0.870053	0.864644	0.6043	0.6588	0.6589	0.9162	0.8958	0.6343	0.398615	0.434565	0.434631	0.6043	0.6595	0.6554	0.8535	0.8089	0.7043	0.398615	0.435026	0.432322	37.8486	39.4397	39.3939	38.5458	39.2896	40.2649	23.6056	21.2284	20.5534	23.6056	21.3362	20.0264
44	1	89	115	133	0.8889	1.2778	1.6389	0.56474	0.811817	1.04123	1.2148	1.3145	1.4695	4.65348	1.71407	1.05148	0.771792	0.835133	0.933609	0.604	0.6541	0.7416	2.5652	1.1709	0.6922	0.383736	0.415565	0.471156	0.6074	0.6573	0.7348	3.1798	0.8817	0.4714	0.385896	0.417598	0.466836	39.6566	41.0256	41.8048	40	41.3123	43.4944	20.1145	17.4603	15.1013	20.6868	17.9487	14.1805
45	1	83	105	121	0.8333	1.1667	1.3889	0.551854	0.772649	0.919801	1.212	1.3213	1.381	1.62418	2.32572	1.6878	0.802649	0.875033	0.91457	0.6028	0.6621	0.6885	2.6874	1.5207	0.8631	0.399205	0.438477	0.45596	0.606	0.6606	0.6905	1.1811	1.317	0.8391	0.401325	0.437483	0.457285	37.788	39.6476	39.7695	38.1971	40.5077	42.3851	23.8095	19.9339	17.7233	24.3472	19.7137	18.0115
46	1	111	123	132	1.1667	1.3889	1.75	0.762051	0.907185	1.14304	1.2877	1.3829	1.5692	3.10371	1.29921	1.23287	0.841084	0.903266	1.02495	0.6417	0.6915	0.7846	1.5	0.7954	0.4714	0.419138	0.451666	0.512476	0.6439	0.6915	0.7846	1.7128	0.6468	0.5528	0.420575	0.451666	0.512476	38.9773	40.0287	41.6357	38.3918	40.4591	40.7063	22.5	19.5122	17.658	22.8409	19.5122	17.658
47	1	121	123	147	1.2778	1.2778	1.5556	0.827055	0.827055	1.00686	1.3033	1.2465	1.2894	2.06695	2.16708	1.05553	0.84356	0.806796	0.834563	0.6495	0.6226	0.6456	0.8165	1.2044	0.6667	0.420388	0.402977	0.417864	0.6517	0.6233	0.6447	1.0541	1.057	0.4374	0.421812	0.40343	0.417282	38.5792	38.5405	39.4913	38.4532	37.9271	40.0804	22.8415	23.4892	20.4819	23.1694	23.6032	20.3481
48	1	106	123	126	1.1667	1.3889	1.5556	0.724658	0.862671	0.966211	1.3213	1.3854	1.5222	3.29648	1.78991	1.48887	0.820683	0.860497	0.945466	0.6606	0.6936	0.76	1.8498	0.583	0.6389	0.410311	0.430807	0.47205	0.6606	0.6927	0.7611	1.8667	0.8927	0.7284	0.410311	0.430248	0.472733	39.8455	40.9262	41.9591	41.9426	42.8571	43.5036	18.2119	16.2703	14.4737	18.2119	16.1452	14.6199
49	1	104	131	152	0.9444	1.5556	2	0.60929	1.00361	1.29032	1.0965	1.4486	1.5571	2.50961	2.04013	1.27121	0.707419	0.934581	1.00458	0.5487	0.7272	0.7786	1.6248	1.1456	0.5624	0.354	0.469161	0.502323	0.5483	0.7243	0.7786	1.4569	0.9499	0.4949	0.353742	0.46729	0.502323	37.4355	40.6417	43.4862	37.8984	40.5369	43.8532	24.6988	18.984	12.6606	24.6127	18.5829	12.6606
50	1	93	114	142	0.8889	1.2778	1.75	0.557304	0.801129	1.09718	1.1671	1.3369	1.4992	4.28212	1.78418	2.30189	0.731724	0.838182	0.939937	0.5853	0.67	0.7525	2.8814	0.8077	0.9574	0.366959	0.420063	0.471787	0.5836	0.6684	0.7496	2.8111	0.9333	0.986	0.365893	0.41906	0.469969	37.8132	39.9285	42.6357	38.4615	40.6213	43.5798	23.8421	19.5471	13.9535	23.5383	19.3087	13.5659
51	1	98	127	144	0.8333	1.3889	1.75	0.561902	0.936548	1.18004	1.0424	1.2986	1.4853	4.86206	1.85254	2.85198	0.7029	0.875657	1.00155	0.517	0.6484	0.7416	2.8719	0.5555	1.0533	0.348618	0.437222	0.500067	0.5212	0.6493	0.7427	3.041	0.866	1.2103	0.35145	0.437829	0.500809	38.9011	42.3025	43.2153	36.9186	41.1765	42.7099	23.8828	16.4659	14.0118	24.6886	16.5997	14.1593
52	1	115	120	144	1.2778	1.3889	1.75	0.796137	0.865358	1.09034	1.3317	1.3715	1.4825	2.15874	1.58111	2.33668	0.82972	0.854517	0.923676	0.6652	0.6823	0.7388	1.0394	0.8197	0.7491	0.414455	0.425109	0.460312	0.6659	0.6858	0.7413	1.1249	0.7806	0.9897	0.414891	0.42729	0.461869	38.3138	40.2036	41.6244	39.0192	40.1266	41.8212	22.6254	19.4656	16.4129	22.7321	19.9746	16.7513
53	1	98	115	140	0.9444	1.2778	1.75	0.638108	0.863378	1.18243	1.1753	1.3433	1.4725	5.29107	3.93471	2.49528	0.794122	0.907635	0.994932	0.5882	0.6636	0.7325	2.0154	1.7036	0.8748	0.397432	0.448378	0.494932	0.5877	0.6716	0.7363	3.2923	2.0682	1.0498	0.397095	0.453784	0.4975	39.6075	40.9146	42.4915	39.0179	41.6171	43.6333	21.4095	16.9675	13.6519	21.3202	18.1709	14.1638
54	1	117	125	144	1.2778	1.5556	1.75	0.845106	1.02884	1.15741	1.3161	1.4889	1.505	2.61424	0.731254	1.52244	0.870437	0.984722	0.99537	0.6589	0.7422	0.7513	1.1842	0.5249	0.6776	0.43578	0.490873	0.496892	0.6581	0.7444	0.7525	1.3463	0.3499	0.6547	0.435251	0.492328	0.497685	40.3636	41.4671	43.0948	41.2621	42.2388	44.0199	18.4242	16.1677	12.812	18.303	16.4671	12.9784
55	1	98	112	145	0.8333	1.0833	1.5556	0.575483	0.748135	1.07431	1.0212	1.1375	1.2736	3.55458	1.67976	2.7609	0.705249	0.785566	0.879558	0.5125	0.5681	0.6388	2.056	0.8958	1.1022	0.353936	0.392334	0.44116	0.5106	0.5688	0.6368	2.178	0.8819	1.1302	0.352624	0.392818	0.439779	37.1027	39.6186	42.0091	39.5401	42.0106	44.1221	23.5033	18.3263	14.003	23.1338	18.4322	13.6986
56	1	110	125	140	1.0833	1.3889	1.75	0.741986	0.951301	1.19863	1.1808	1.3657	1.4575	1.93412	1.91763	1.39352	0.808767	0.935411	0.998288	0.591	0.6844	0.7263	0.7244	1.1083	0.378	0.404795	0.468767	0.497466	0.5904	0.6829	0.7288	1.0541	0.9428	0.5803	0.404384	0.46774	0.499178	40.3259	41.4882	43.2014	39.7554	41.4689	43.3962	19.9593	17.1364	13.253	19.8574	16.9109	13.5972
57	1	74	100	126	0.6667	1	1.5556	0.441523	0.662252	1.0302	1.094	1.2244	1.5067	2.38293	1.22427	1.60216	0.724503	0.810861	0.997815	0.5477	0.6122	0.7556	2.4088	0.7115	0.7284	0.362715	0.40543	0.500397	0.547	0.6122	0.7533	1.9551	0.7495	0.7759	0.362252	0.40543	0.498874	35.6665	37.2958	39.4118	38.7569	38.657	40.2655	25.6239	24.0472	20.4412	25.5021	24.0472	20.1471
58	1	104	114	134	1	1.1667	1.5556	0.694444	0.810208	1.08028	1.14	1.2069	1.3825	2.38623	1.93938	1.18518	0.791667	0.838125	0.960069	0.569	0.6028	0.6893	1.546	1.1785	0.348	0.395139	0.418611	0.478681	0.57	0.6034	0.6913	1.3602	1.0031	0.5266	0.395833	0.419028	0.480069	38.6643	39.7849	41.7489	39.386	40.2793	42.4754	21.8805	19.8925	15.6559	22.0562	20	15.9379
59	1	114	133	140	1.1667	1.3889	1.5556	0.768577	0.914954	1.02477	1.2082	1.2747	1.3144	1.99001	1.52183	0.836857	0.795916	0.839723	0.865876	0.6008	0.6366	0.6553	1	0.4082	0.5449	0.395784	0.419368	0.431686	0.6041	0.6373	0.6572	1.0304	0.6983	0.3536	0.397958	0.419829	0.432938	38.2956	39.7576	40.6528	38.1974	40.678	41.2722	23.301	19.5152	17.9525	23.8403	19.6364	18.2493
[truncated: 39 more columns]

## Sheet: Aged 70-74
Legend:	Slower: slower walking speed	Preferred: preferred walking speed	Faster: faster walking speed
Number	Age classify	Slower Cadence	Preferred Cadence	Faster Cadence	Slower walking speed	Preferred walking speed	Faster walking speed	Slower walking speed_Normalized	Preferred walking speed_Normalized	Faster walking speed_Normalized	Slower Stride Length	Preferred Stride Length	Faster Stride Length	Slower Stride Length Coefficient of Variance	Preferred Stride Length Coefficient of Variance	Faster Stride Length Coefficient of Variance	Slower Stride Length Normalized	Preferred Stride Length_Normalized	Faster Stride Length Normalized	Slower Left Step Length	Preferred Left Step Length	Faster Left Step Length	Slower Left Step Length Coefficient of Variance	Preferred Left Step Length Coeffient of Variance	Faster Left Step Length Coefficient of Variance	Slower Left Step Length Normalized	Preferred Left Step Length Normalized	Faster Left Step Length Normalized	Slower Right Step Length	Preferred Right Step Length	Faster Right Step Length	Slower Right Step Length Coefficient of Variance	Preferred Right Step Length Coefficient of Variance	Faster Right Step Length Coefficient of Variance	Slower Right Step Length Normalized	Preferred Right Step Length_Normalized	Faster Right Step Length Normalized	Slower Left Single Support	Preferred Left Single Support	Faster Left Single Support	Slower Right Single Support	Preferred Right Single Support	Faster Right Single Support	Slower Left Double Support	Preferred Left Double Support	Faster Left Double Support	Slower Right Double Support	Preferred Right Double Support	Faster Right Double Support
1	2	103	118	122	0.9444	1.1667	1.3333	0.6296	0.7778	0.888867	1.0926	1.1675	1.319	1.66597	1.38595	0.837482	0.7284	0.778333	0.879333	0.546	0.5833	0.6579	1.1163	0.9449	0.6902	0.364	0.388867	0.4386	0.5463	0.5838	0.6595	0.9637	0.6934	0.4142	0.3642	0.3892	0.439667	36	37.7143	38.5035	37.2231	38.4725	39.1135	26.7568	23.7857	22.2915	26.8108	23.8571	22.5253
2	2	110	134	146	0.9444	1.3333	1.6667	0.619279	0.874295	1.09292	1.0333	1.2	1.3615	1.90836	2.14684	1.62006	0.677574	0.786885	0.892787	0.5161	0.6	0.6808	0.7624	1.1972	0.6617	0.338426	0.393443	0.446426	0.5167	0.6	0.6808	1.044	0.9661	0.6617	0.33882	0.393443	0.446426	39.0205	41.037	41.5254	39.4624	40.4444	42.0904	21.4747	18.5185	16.3842	21.5823	18.5185	16.3842
3	2	124	134	136	1.25	1.5278	1.6667	0.848608	1.0372	1.1315	1.2196	1.3966	1.4697	1.43459	1.51172	0.944883	0.82797	0.948133	0.99776	0.6116	0.6977	0.7348	0.961	0.5893	0.5961	0.415207	0.473659	0.498846	0.6098	0.6983	0.7348	0.6999	0.691	0.4166	0.413985	0.474067	0.498846	37.6642	39.2336	40.2062	40.4832	41.3856	42.3711	21.9708	19.3431	17.4227	21.6788	19.4343	17.4227
4	2	128	131	143	1.25	1.6667	1.8056	0.814863	1.08651	1.17705	1.1973	1.5046	1.5003	1.72805	1.34357	1.40111	0.780508	0.980834	0.978031	0.5996	0.7515	0.7501	0.8755	0.5143	0.8106	0.390874	0.489896	0.488983	0.5987	0.7523	0.7501	0.8276	0.6064	0.5821	0.390287	0.490417	0.488983	40.4319	42.3387	43.326	39.821	42.2961	42.1225	19.8064	15.3226	14.5514	19.6575	15.4234	14.5514
5	2	112	117	118	1.1667	1.25	1.3333	0.736088	0.788644	0.841199	1.2331	1.274	1.3662	2.38743	1.78287	1.65155	0.777981	0.803785	0.861956	0.6143	0.6365	0.6826	0.9881	0.7029	0.9515	0.387571	0.401577	0.430662	0.6165	0.637	0.6831	1.2616	0.9085	0.8462	0.388959	0.401893	0.430978	38.4222	39.3505	39.5192	38.9374	39.7736	39.7147	22.4982	20.8459	20.7363	22.8634	20.9215	20.8114
6	2	71	110	122	0.7222	1.3333	1.5278	0.464437	0.857428	0.982508	1.2149	1.4533	1.4792	3.56796	0.648714	1.23147	0.781286	0.934598	0.951254	0.609	0.7272	0.7396	2.6228	0.5575	0.5143	0.39164	0.467653	0.475627	0.6074	0.7267	0.7396	3.0011	0.3536	0.5961	0.390611	0.467331	0.475627	39.0089	39.5722	41.4085	38.0892	39.3731	40.1878	22.9987	21.0848	18.4038	22.7446	21.0084	18.4038
7	2	114	124	139	1.1667	1.25	1.6667	0.736088	0.788644	1.05155	1.2555	1.2339	1.4242	2.23322	2.27905	2.56219	0.792114	0.778486	0.898549	0.6269	0.6156	0.7106	0.8231	1.0133	0.7714	0.395521	0.388391	0.448328	0.6278	0.617	0.7121	1.2016	1.1249	1.0947	0.396088	0.389274	0.449274	40.8017	41.7694	42.9638	40.9578	41.3893	44.0426	18.1818	16.7513	12.8998	18.325	16.9688	13.113
8	2	108	120	120	1.1667	1.25	1.3333	0.770099	0.825083	0.880066	1.3058	1.242	1.3133	1.9342	1.23893	1.20833	0.861914	0.819802	0.866865	0.6542	0.6219	0.6561	1.124	0.6196	0.5575	0.431815	0.410495	0.433069	0.6529	0.621	0.6567	1.0824	0.6155	0.5951	0.430957	0.409901	0.433465	39.6433	40.8471	41.3209	39.1753	39.8994	40.4399	21.262	19.3108	18.2049	21.0562	19.1673	18.2896
9	2	107	126	136	1.1111	1.5278	1.6667	0.726209	0.998562	1.08935	1.2752	1.4348	1.4455	1.71405	1.33688	1.39851	0.833464	0.937778	0.944771	0.6368	0.7181	0.7235	0.9911	0.6124	0.7329	0.416209	0.469346	0.472876	0.6376	0.7174	0.7227	0.9836	0.6278	0.6064	0.416732	0.468889	0.472353	41.3423	42.0213	41.9895	41.1528	42.5909	42.9769	17.4497	15.4255	15.0785	17.5839	15.3369	14.9738
10	2	100	122	122	1.1667	1.5278	1.5278	0.767566	1.00513	1.00513	1.3864	1.4889	1.4835	2.19539	1.33889	1.75077	0.912105	0.979539	0.975987	0.6903	0.7451	0.7417	1.1961	0.8357	0.522	0.454145	0.490197	0.487961	0.6932	0.7444	0.7417	1.3044	0.6524	0.85	0.456053	0.489737	0.487961	39.7183	41.0065	41.9156	40.7433	41.5112	42.3275	19.3662	17.521	15.757	19.7887	17.4278	15.757
11	2	94	115	129	1	1.1667	1.6667	0.678887	0.792057	1.1315	1.2762	1.2358	1.5394	3.23131	1.65319	1.32782	0.866395	0.838968	1.04508	0.6377	0.6175	0.7705	2.0155	0.8207	0.6524	0.432926	0.419212	0.523082	0.6381	0.6179	0.7697	2.0619	0.8755	0.6132	0.433198	0.419484	0.522539	37.6357	39.4062	40.8063	38.3363	38.9751	41.2402	24.0048	21.5924	17.9941	24.0651	21.6599	17.8958
12	2	83	116	125	0.6944	1	1.4167	0.47078	0.677966	0.960475	1	1.0294	1.3777	5.18613	2.67544	3.36174	0.677966	0.697898	0.934034	0.4996	0.515	0.6918	2.7583	1.3395	1.6874	0.338712	0.349153	0.469017	0.5	0.5147	0.6889	3.7342	1.377	1.6346	0.338983	0.348949	0.467051	37.722	40.2627	42.8328	34.6451	37.4286	40.7883	27.6062	22.3301	16.5529	27.6834	22.273	16.1263
13	2	102	116	144	0.9444	1.1667	1.75	0.66042	0.815874	1.22378	1.1258	1.1861	1.4744	5.83359	0.927379	1.65208	0.787273	0.829441	1.03105	0.5653	0.5924	0.7361	3.3694	0.6713	0.6343	0.395315	0.414266	0.514755	0.5629	0.5931	0.7372	3.4771	0.4714	0.696	0.393636	0.414755	0.515524	36.2573	39.2779	42.4963	36.9966	39.4536	41.3947	26.9006	21.2254	16.0475	26.4829	21.3348	16.1961
14	2	92	106	118	0.7778	1.0833	1.3889	0.536414	0.747103	0.957862	1.0224	1.2109	1.4097	3.37686	1.67518	1.1015	0.705103	0.835103	0.972207	0.5112	0.6067	0.7031	2.2091	0.7071	0.7806	0.352552	0.418414	0.484897	0.5112	0.6055	0.7049	2.2194	0.9362	0.559	0.352552	0.417586	0.486138	36.9295	38.8889	41.1111	36.5145	38.8668	40.5172	26.556	22.3214	18.2716	26.556	22.123	18.5185
15	2	110	118	129	1.0833	1.1667	1.2778	0.717417	0.772649	0.846225	1.2014	1.2098	1.2125	2.03432	2.11507	1.82159	0.795629	0.801192	0.80298	0.6023	0.6055	0.6069	1.0677	1.179	0.527	0.398874	0.400993	0.401921	0.6007	0.6049	0.6062	1.1281	1.0966	0.8642	0.397815	0.400596	0.401457	38.4892	38.8247	39.883	38.1425	39.1514	39.2272	23.4712	22.0617	20.9357	23.2014	21.9653	20.8187
16	2	119	134	167	1.2778	1.5556	2	0.805167	0.980214	1.26024	1.2977	1.3825	1.46	0.674397	1.81766	1.03548	0.817706	0.871141	0.919975	0.6495	0.6942	0.7314	0.8819	0.7806	0.6776	0.409263	0.437429	0.46087	0.6488	0.6913	0.73	0.3425	0.8077	0.378	0.408822	0.435602	0.459987	40.765	41.5966	44.5312	41.6849	42.7567	44.8141	17.5956	15.8263	10.7422	17.4863	15.4062	10.5469
17	2	88	100	123	0.6667	0.8889	1.2778	0.428746	0.57164	0.821736	0.9046	1.0748	1.2607	5.72628	1.84777	1.78772	0.581736	0.69119	0.81074	0.4549	0.5398	0.6311	3.8059	1.8261	1.1249	0.29254	0.347138	0.405852	0.4523	0.5374	0.6304	3.8848	1.1171	0.8819	0.290868	0.345595	0.405402	36.1894	37.0509	38.0202	36.6213	37.3684	39.8649	27.3957	25.7485	22.1597	26.832	25.2994	22.0472
18	2	119	136	140	1.2778	1.75	1.75	0.793665	1.08696	1.08696	1.2693	1.5175	1.4525	2.76711	2.52012	2.80711	0.788385	0.942547	0.902174	0.6311	0.76	0.7275	1.5051	1.0833	1.2936	0.391988	0.47205	0.451863	0.6346	0.7588	0.7263	1.3744	1.0927	1.165	0.394161	0.471304	0.451118	40.8324	42.4342	42.6117	40.9396	42.8336	42.5129	17.9978	14.8026	14.9485	18.5602	14.6382	14.7766
19	2	99	119	127	1.0833	1.2778	1.5556	0.69	0.813885	0.990828	1.3084	1.3033	1.4689	1.73573	1.20074	1.24753	0.833376	0.830127	0.935605	0.6548	0.6517	0.7333	1.2348	0.7071	0.789	0.41707	0.415096	0.46707	0.6542	0.6517	0.7344	1.0482	0.6124	0.589	0.416688	0.415096	0.467771	38.511	39.7059	40.303	37.8105	39.7059	40.5446	23.7132	20.5882	19.0909	23.6213	20.5882	19.2424
20	2	111	117	130	1.0833	1.2778	1.75	0.747103	0.881241	1.2069	1.1628	1.3193	1.61	2.40547	0.937744	1.0063	0.801931	0.909862	1.11034	0.5814	0.6605	0.805	1.3333	0.6585	0.7071	0.400966	0.455517	0.555172	0.5814	0.6597	0.805	1.291	0.4841	0.4629	0.400966	0.454966	0.555172	40.4762	42.3216	43.7888	40.5797	42.0097	44.5652	18.9441	15.7195	11.646	18.9441	15.5985	11.646
21	2	106	116	149	0.8333	1	1.5556	0.559262	0.671141	1.04403	0.9646	1.0409	1.2375	3.03646	3.02296	3.56097	0.647383	0.698591	0.830537	0.4809	0.5186	0.6162	2.1453	1.1499	0.9655	0.322752	0.348054	0.413557	0.4823	0.5205	0.6188	1.7574	1.5733	1.4164	0.323691	0.349329	0.415302	37.3285	38.1245	40.533	37.437	39.8253	42.0391	25.1264	21.9106	17.2511	25.4152	22.2612	17.6718
22	2	109	117	132	1.1667	1.3889	1.75	0.729187	0.868062	1.09375	1.3054	1.4288	1.605	3.02185	2.08704	2.07819	0.815875	0.893	1.00312	0.6501	0.7109	0.8063	1.5476	0.7474	0.9794	0.406312	0.444312	0.503937	0.6527	0.7144	0.8025	1.6906	1.0735	0.953	0.407937	0.4465	0.501562	39.0828	41.0256	41.8605	39.7219	41.1908	43.3022	21.0369	17.5824	15.0388	21.4357	18.0708	14.5736
23	2	102	106	119	1	1.0833	1.3889	0.673401	0.729495	0.935286	1.179	1.2302	1.3924	2.12723	2.0383	1.47528	0.793939	0.828418	0.937643	0.5895	0.6157	0.6979	1.15	1.1547	0.9014	0.39697	0.414613	0.469966	0.5895	0.6151	0.6962	1.254	1.1574	0.7395	0.39697	0.414209	0.468822	37.9135	38.3187	40.6716	37.9983	38.454	40.0249	24.0882	23.2649	19.403	24.0882	23.1672	19.1542
24	2	82	100	123	0.6389	0.8333	1.2778	0.410604	0.53554	0.821208	0.9284	1.0104	1.2749	2.63619	4.02803	0.918284	0.596658	0.649357	0.819344	0.4654	0.5024	0.636	2.6046	2.2028	0.3425	0.2991	0.322879	0.40874	0.4642	0.5052	0.6375	1.9154	2.442	0.4581	0.298329	0.324679	0.409704	35.1109	36.9039	40.5134	37.4801	38.0756	40.4232	27.5079	24.81	18.9732	27.2439	25.3628	19.1964
25	2	110	123	133	1	1.1667	1.3889	0.694444	0.810208	0.964514	1.1109	1.1667	1.2608	1.93654	0.8944	2.25035	0.771458	0.810208	0.875556	0.5568	0.5828	0.6273	1.0928	0.7228	0.9129	0.386667	0.404722	0.435625	0.5555	0.5833	0.6304	1.0757	0.4472	1.0214	0.385764	0.405069	0.437778	37.551	39.1391	40.7134	39.198	40.4	40.7589	23.3469	20.4204	18.3272	23.102	20.5205	18.8192
26	2	98	98	115	0.8889	0.9444	1.3889	0.569808	0.605385	0.890321	1.088	1.1503	1.4965	1.22281	2.16597	1.2056	0.697436	0.737372	0.959295	0.5431	0.5742	0.7483	0.9695	1.0536	0.9601	0.348141	0.368077	0.479679	0.544	0.5752	0.7483	0.7483	1.3191	0.6495	0.348718	0.368718	0.479679	37.8069	37.9934	40.1392	38.1536	38.5878	41.0673	23.9771	23.3553	18.7935	24.1408	23.5197	18.7935
27	2	97	113	124	0.9444	1.0833	1.3889	0.596589	0.684334	0.877385	1.1588	1.1462	1.3767	4.31329	2.95266	1.62972	0.732028	0.724068	0.869678	0.5804	0.5709	0.6884	2.9108	1.2083	0.8455	0.366646	0.360644	0.43487	0.5794	0.5731	0.6884	2.6462	1.5621	0.8077	0.366014	0.362034	0.43487	37.5915	39.3738	40.7314	36.3488	37.5236	40.1009	26.1188	22.9602	19.1677	25.9561	23.3397	19.1677
28	2	102	116	137	1	1.1667	1.5556	0.694444	0.810208	1.08028	1.186	1.1926	1.3689	3.54132	2.29554	2.34278	0.823611	0.828194	0.950625	0.593	0.5982	0.6825	2.3152	1.2273	1.0533	0.411806	0.415417	0.473958	0.593	0.5963	0.6844	2.1	1.1733	1.0308	0.411806	0.414097	0.475278	39.5447	40.7367	41.8803	40.1349	39.8913	41.4773	20.3204	19.5016	16.5242	20.3204	19.1766	16.8091
29	2	100	111	143	1	1.0833	1.5556	0.648088	0.702074	1.00817	1.2167	1.1938	1.33	2.48089	2.1009	3.65215	0.788529	0.773688	0.861957	0.605	0.5996	0.6621	1.291	1.05	1.55	0.392093	0.388594	0.429099	0.6083	0.5969	0.665	1.5092	1.1576	1.5613	0.394232	0.386844	0.430979	39.7612	39.8374	43.4655	38.5388	38.657	41.0819	21.4876	21.6802	15.2717	22.0386	21.2285	15.7122
30	2	111	113	136	1.2778	1.3889	1.75	0.816486	0.887476	1.11821	1.411	1.5318	1.6013	3.98753	4.51315	2.25304	0.901597	0.978786	1.02319	0.7092	0.7728	0.8021	2.252	2.1333	0.8498	0.453163	0.493802	0.512524	0.7055	0.7659	0.8006	2.2016	2.4888	1.0308	0.450799	0.489393	0.511565	40.4118	40.1797	41.6364	40.621	39.7668	41.5301	19.1763	20.4108	16.9091	18.6615	19.5122	16.7273
31	2	106	112	125	0.8889	0.8889	1.0833	0.619443	0.619443	0.754913	1.0271	0.9763	1.0508	3.24586	3.15035	2.36722	0.715749	0.680348	0.732265	0.5127	0.4881	0.5239	2.0701	1.5523	0.8282	0.357282	0.340139	0.365087	0.5135	0.4881	0.5254	1.8752	1.73	1.1481	0.35784	0.340139	0.366132	38.4555	39.0744	39.0977	36.8214	36.4947	36.7385	24.6651	24.431	24.0602	24.8227	24.431	24.3421
32	2	102	119	132	1.1667	1.5556	1.75	0.75271	1.00361	1.12903	1.3767	1.5733	1.5721	3.59544	1.53434	3.10995	0.888194	1.01503	1.01426	0.6891	0.7878	0.7802	2.0682	0.953	1.5657	0.444581	0.508258	0.503355	0.6883	0.7867	0.786	2.1213	0.7759	1.3969	0.444065	0.507548	0.507097	38.6243	39.7743	41.8692	39.4068	40.9605	41.9295	22.0106	19.323	15.8879	21.9048	19.1819	16.6355
33	2	104	121	130	1.0833	1.1667	1.3889	0.701165	0.755146	0.898964	1.235	1.1952	1.2813	2.14862	1.6662	1.85783	0.799353	0.773592	0.82932	0.6151	0.5995	0.6406	1.6685	0.7738	0.9601	0.398123	0.388026	0.414628	0.6175	0.5976	0.6406	1.2247	0.8535	0.857	0.399676	0.386796	0.414628	39.2368	39.7838	40.9214	38.7914	40.4555	42.6829	21.82	19.8919	16.3957	22.2114	19.5676	16.3957
34	2	95	100	122	1	1	1.3889	0.649351	0.649351	0.901883	1.28	1.2311	1.3507	2.99195	2.9273	1.60546	0.831169	0.799416	0.877078	0.6383	0.6122	0.6771	1.5456	2.1617	0.8292	0.414481	0.397532	0.439675	0.64	0.6156	0.6753	1.9149	1.8019	0.7806	0.415584	0.39974	0.438506	39.5126	39.2922	40.3846	38.8889	38.7184	40.2314	21.497	21.7786	19.4872	21.7581	22.323	19.2308
35	2	110	118	133	1	1.1667	1.5556	0.651466	0.760065	1.01342	1.093	1.1796	1.4506	3.3	5.71887	1.67431	0.712052	0.768469	0.945016	0.549	0.5885	0.7263	1.9339	2.1271	0.4961	0.357655	0.383388	0.47316	0.5465	0.5898	0.7253	1.8035	2.891	0.7806	0.356026	0.384235	0.472508	38.6157	40.0881	40.9639	39.0668	39.3407	41.1528	22.4954	20.4846	17.9384	22.0401	20.7048	17.8046
36	2	105	131	135	1	1.3889	1.5556	0.623053	0.865358	0.969221	1.1578	1.2726	1.3822	3.30221	2.72509	1.94276	0.721371	0.792897	0.861184	0.5772	0.6345	0.6933	1.9309	0.4285	0.7284	0.359626	0.395327	0.431963	0.5789	0.6363	0.6911	1.9116	1.2484	0.8631	0.360685	0.396449	0.430592	38.1136	39.2613	39.5833	38.7716	39.1542	41.8006	23.0029	21.4774	18.75	23.2916	21.751	18.4295
37	2	109	110	122	1.2778	1.3889	1.75	0.840658	0.91375	1.15132	1.4551	1.5	1.6765	1.98498	3.13021	1.67015	0.957303	0.986842	1.10296	0.7275	0.752	0.8365	0.9499	1.7467	0.5099	0.478618	0.494737	0.550329	0.7275	0.75	0.8383	1.1302	1.6903	0.8	0.478618	0.493421	0.551513	39.9561	40.3694	42.2594	40.2854	40.873	43.0063	19.7585	18.8654	14.6444	19.7585	18.6016	14.8536
38	2	108	122	137	0.8889	1.0833	1.3889	0.542674	0.661355	0.847924	0.9815	1.0715	1.2278	1.90178	1.52137	1.83799	0.599206	0.654151	0.749573	0.4915	0.5367	0.6153	1.1079	0.8106	0.5568	0.300061	0.327656	0.375641	0.4907	0.5358	0.6139	1.05	0.7524	0.8124	0.299573	0.327106	0.374786	37.2268	38.0734	38.7133	37.8113	39.1544	40.724	25.0188	22.844	20.6546	24.8681	22.6606	20.4289
39	2	115	117	131	1.1667	1.3889	1.5556	0.743595	0.885214	0.99146	1.26	1.4048	1.4533	1.15485	3.31841	1.88528	0.803059	0.895347	0.926259	0.6274	0.7014	0.7267	0.8535	1.5119	1.0643	0.399873	0.447036	0.463161	0.63	0.7024	0.7267	0.6236	1.6782	0.8806	0.40153	0.447674	0.463161	41.219	42.4328	42.0489	41.4609	42.3729	43.2722	17.1488	15.1344	14.6789	17.562	15.2758	14.6789
40	2	96	117	127	0.9444	1.1667	1.3889	0.621725	0.768071	0.914352	1.1494	1.2263	1.3472	2.38277	2.17157	1.78571	0.756682	0.807307	0.886899	0.5756	0.6138	0.6736	1.7671	1.0482	0.9682	0.378934	0.404082	0.44345	0.5747	0.6131	0.6736	1.45	1.1413	0.866	0.378341	0.403621	0.44345	36.8335	40.1267	40.8505	37.7157	39.3235	40.8505	25.5127	20.5913	18.299	25.3486	20.4857	18.299
41	2	110	125	141	0.9444	1.2778	1.5556	0.638108	0.863378	1.05108	1.0458	1.2126	1.3144	1.9288	1.3699	2.43992	0.706622	0.819324	0.888108	0.5216	0.6076	0.6563	1.3877	0.65	0.8638	0.352432	0.410541	0.443446	0.5229	0.6063	0.6572	1.0679	0.65	1.0308	0.353311	0.409662	0.444054	39.3416	40.1682	42.0741	38.0952	40.2529	41.568	22.4691	19.6635	16.2963	22.716	19.4532	16.4444
42	2	114	123	142	1.1667	1.3889	1.75	0.800206	0.952606	1.20027	1.2678	1.3281	1.5175	3.00555	1.80658	1.18804	0.869547	0.910905	1.04081	0.6319	0.6623	0.7563	1.5811	0.8992	0.2474	0.433402	0.454252	0.518724	0.6339	0.6641	0.7588	1.633	0.8638	0.5151	0.434774	0.455487	0.520439	39.3846	41.1533	42.1488	39.5706	41.8301	42.9984	20.9231	16.9069	14.7107	21.2308	17.1691	15.0413
43	2	93	117	134	0.75	1.1667	1.5556	0.491803	0.765049	1.02007	0.9931	1.2028	1.3689	5.05161	1.53064	2.01459	0.651213	0.788721	0.897639	0.4991	0.6003	0.6844	3.0988	0.9341	0.9258	0.327279	0.393639	0.448787	0.4966	0.6014	0.6844	3.3445	0.789	0.8864	0.325639	0.394361	0.448787	39.2611	41.3994	42.8571	37.4449	39.6702	42.5325	23.4815	18.8533	14.6104	22.9806	19.0476	14.6104
44	2	100	102	123	0.9444	1	1.3889	0.619279	0.655738	0.910754	1.1371	1.15	1.3837	2.29568	2.09417	0.995929	0.745639	0.754098	0.907344	0.5681	0.5755	0.6901	1.246	1.3314	0.6092	0.372525	0.377377	0.452525	0.5686	0.575	0.6918	1.382	1.2042	0.4961	0.372852	0.377049	0.453639	38.3209	38.3145	39.8742	36.1296	37.7391	40.1506	25.5195	23.9791	19.8742	25.6027	23.8923	20.1258
45	2	113	129	143	1.0833	1.3889	1.5556	0.710361	0.910754	1.02007	1.1798	1.3194	1.3397	1.44893	1.57901	2.81069	0.773639	0.86518	0.878492	0.5899	0.6597	0.6718	0.7228	0.6124	1.1163	0.38682	0.43259	0.440525	0.5899	0.6597	0.6699	0.789	0.75	1.2103	0.38682	0.43259	0.439279	37.6492	38.8158	40.0868	37.0983	39.0789	40.6386	25.2525	22.1053	19.3922	25.2525	22.1053	19.1027
46	2	114	123	133	1.0833	1.1667	1.3889	0.727047	0.78302	0.932148	1.1538	1.1628	1.2485	2.30941	1.63848	2.53918	0.774362	0.780403	0.837919	0.5758	0.5807	0.6258	1.3048	0.8535	1.2121	0.386443	0.389732	0.42	0.5769	0.5814	0.6242	1.2298	0.8165	1.1413	0.387181	0.390201	0.418926	38.0056	39.0625	40.8138	38.5915	39.2419	39.8022	23.3302	21.6518	19.4821	23.5183	21.7634	19.2355
47	2	100	114	125	0.8333	1.0833	1.2778	0.557391	0.724615	0.854716	0.9955	1.1255	1.2394	2.72675	0.842096	1.54647	0.665886	0.752843	0.82903	0.4992	0.5615	0.6189	1.7165	0.5774	0.6343	0.333913	0.375585	0.41398	0.4977	0.5627	0.6197	1.6288	0.4374	0.75	0.33291	0.376388	0.414515	36.8741	39.5498	40.2581	39.6499	41.2834	42.6546	23.5964	19.0782	17.0323	23.2929	19.2926	17.1613
48	2	98	107	123	0.8889	1	1.2778	0.58712	0.660502	0.843989	1.0764	1.115	1.282	3.01792	2.27776	1.75802	0.710964	0.73646	0.846764	0.539	0.5575	0.6403	1.6389	1.4186	0.737	0.356011	0.36823	0.422919	0.5382	0.5575	0.641	1.8273	1.2698	0.8819	0.355482	0.36823	0.423382	38.7556	40	41.9069	39.5646	39.1031	40.753	21.7391	20.8969	17.2949	21.5892	20.8969	17.4058
49	2	106	125	137	0.9444	1.2778	1.5556	0.666949	0.902401	1.09859	1.081	1.2196	1.365	1.4118	1.4908	2.11299	0.763418	0.861299	0.963983	0.5392	0.6098	0.6844	0.7925	0.6713	0.6614	0.380791	0.43065	0.483333	0.5405	0.6098	0.6825	0.808	0.7115	0.927	0.381709	0.43065	0.481992	37.7389	40.2794	41.3352	38.4432	40.6286	42.735	23.7261	19.092	16.0511	23.965	19.092	15.767
50	2	93	114	133	0.7778	0.9444	1.2778	0.511711	0.621316	0.840658	1.0033	1.0028	1.1756	10.6245	3.63238	3.22439	0.660066	0.659737	0.773421	0.5006	0.5023	0.5897	6.5474	1.9102	1.3238	0.329342	0.330461	0.387961	0.5017	0.5014	0.5878	6.8523	1.9285	1.4832	0.330066	0.329868	0.386711	35.0989	36.4103	39.6533	37.914	37.8425	39.8913	26.9068	25.812	20.585	27.1186	25.641	20.26
51	2	96	115	138	1	1.2778	1.75	0.621118	0.793665	1.08696	1.2478	1.3369	1.51	4.20308	1.84707	1.93079	0.775031	0.830373	0.937888	0.6189	0.6668	0.7588	1.5595	1.5996	1.0595	0.38441	0.414161	0.471304	0.6239	0.6684	0.755	2.6223	0.9662	0.833	0.387516	0.415155	0.468944	39.4973	40.8383	41.8451	40.5165	42.2939	43.2119	19.6589	16.7665	15.1565	20.4668	17.006	14.6623
[truncated: 39 more columns]

## Sheet: Aged over 75
Legend:	Slower: slower walking speed	Preferred: preferred walking speed	Faster: faster walking speed
Number	Age classify	Slower Cadence	Preferred Cadence	Faster Cadence	Slower walking speed	Preferred walking speed	Faster walking speed	Slower walking speed_Normalized	Preferred walking speed_Normalized	Faster walking speed_Normalized	Slower Stride Length	Preferred Stride Length	Faster Stride Length	Slower Stride Length Coefficient of Variance	Preferred Stride Length Coefficient of Variance	Faster Stride Length Coefficient of Variance	Slower Stride Length Normalized	Preferred Stride Length_Normalized	Faster Stride Length Normalized	Slower Left Step Length	Preferred Left Step Length	Faster Left Step Length	Slower Left Step Length Coefficient of Variance	Preferred Left Step Length Coeffient of Variance	Faster Left Step Length Coefficient of Variance	Slower Left Step Length Normalized	Preferred Left Step Length Normalized	Faster Left Step Length Normalized	Slower Right Step Length	Preferred Right Step Length	Faster Right Step Length	Slower Right Step Length Coefficient of Variance	Preferred Right Step Length Coefficient of Variance	Faster Right Step Length Coefficient of Variance	Slower Right Step Length Normalized	Preferred Right Step Length_Normalized	Faster Right Step Length Normalized	Slower Left Single Support	Preferred Left Single Support	Faster Left Single Support	Slower Right Single Support	Preferred Right Single Support	Faster Right Single Support	Slower Left Double Support	Preferred Left Double Support	Faster Left Double Support	Slower Right Double Support	Preferred Right Double Support	Faster Right Double Support
1	3	99	111	128	0.8611	1.1111	1.4167	0.56281	0.726209	0.925948	1.043	1.2048	1.3104	2.94128	1.6613	2.09359	0.681699	0.787451	0.856471	0.5217	0.6024	0.654	1.6201	0.8175	0.825	0.34098	0.393725	0.427451	0.5215	0.6024	0.6552	1.7813	0.9007	0.9682	0.34085	0.393725	0.428235	37.0388	38.0764	40.4332	37.931	39.5916	40.0901	25.0485	22.332	19.4043	25	22.332	19.5848
2	3	104	113	122	1.0556	1.1667	1.3333	0.685455	0.757597	0.865779	1.2177	1.243	1.3167	2.8301	1.7891	1.85449	0.790714	0.807143	0.855	0.6073	0.621	0.6594	1.5407	0.8462	0.9004	0.394351	0.403247	0.428182	0.6088	0.6215	0.6583	1.6323	0.953	0.9157	0.395325	0.403571	0.427468	40.0372	39.8844	41.1963	37.8328	38.7726	39.6624	22.036	21.315	19.2081	22.2843	21.3873	19.0396
3	3	121	127	138	1.25	1.3333	1.6667	0.862069	0.919517	1.14945	1.233	1.2591	1.4389	1.82188	1.18156	1.7267	0.850345	0.868345	0.992345	0.617	0.63	0.7188	0.9147	0.491	0.8447	0.425517	0.434483	0.495724	0.6165	0.6295	0.7194	0.8986	0.5579	0.7454	0.425172	0.434138	0.496138	41.0275	42.328	43.7681	39.2469	40.6203	41.4093	19.754	17.0824	14.7826	19.6816	17.0068	14.8792
4	3	101	124	143	0.9167	1.25	1.6667	0.630468	0.859697	1.14629	1.0994	1.2071	1.3681	2.13541	1.50133	1.05014	0.756121	0.830193	0.940922	0.5486	0.6027	0.6847	1.3775	0.3642	0.5336	0.377304	0.414512	0.470908	0.5497	0.6036	0.684	1.2805	0.7249	0.431	0.378061	0.415131	0.470426	39.7911	41.7778	43.9148	40.6462	41.8639	43.4518	19.4778	16.2963	12.6775	19.6867	16.4444	12.5761
5	3	90	107	125	0.5833	0.8333	1.25	0.405633	0.579485	0.869263	0.7708	0.9311	1.1911	3.1974	2.26488	1.70284	0.536022	0.647497	0.828303	0.3844	0.4658	0.5951	2.2407	1.2202	0.8058	0.267316	0.323922	0.413839	0.3854	0.4656	0.5955	2.1126	1.2654	0.8113	0.268011	0.323783	0.414117	36.4566	38.7006	40.3601	35.3406	37.7296	40.7796	28.1095	23.5876	18.8297	28.3735	23.5405	18.9047
6	3	105	108	112	1	1.1111	1.1667	0.636943	0.707707	0.743121	1.1527	1.2389	1.2654	1.83257	1.58087	2.09672	0.734204	0.789108	0.805987	0.5743	0.6194	0.6313	1.2365	1.0979	1.1461	0.365796	0.394522	0.402102	0.5763	0.6194	0.6327	1.0562	0.8814	1.1371	0.36707	0.394522	0.402994	38.0731	38.7572	39.5167	38.4037	38.6291	39.6454	23.3894	22.6137	20.7534	23.7377	22.6137	20.9666
7	3	116	120	131	1.0556	1.1667	1.3333	0.703733	0.7778	0.888867	1.0852	1.1472	1.2133	2.38813	3.59407	3.71495	0.723467	0.7648	0.808867	0.5433	0.5744	0.6067	1.3632	1.8427	1.6691	0.3622	0.382933	0.404467	0.5426	0.5736	0.6067	1.2275	1.767	1.6903	0.361733	0.3824	0.404467	38.5549	39.2688	39.9529	36.8997	37.6271	38.4615	24.5902	23.155	21.5856	24.4687	23.0196	21.5856
8	3	85	99	103	0.5556	0.7778	0.8333	0.360078	0.504083	0.540052	0.7908	0.9497	0.9574	4.29923	2.86059	3.86953	0.512508	0.615489	0.62048	0.397	0.4761	0.478	2.3027	1.894	2.1069	0.257291	0.308555	0.309786	0.3954	0.4749	0.4787	3.0596	1.7464	2.2229	0.256254	0.307777	0.31024	37.2072	40.6277	40.339	36.3164	37.4138	38.2012	26.62	22.055	21.4044	26.2245	21.7971	21.5496
9	3	124	113	148	1.1111	1.25	1.8056	0.70546	0.793651	1.14641	1.0889	1.3192	1.4499	1.81578	1.51493	3.05292	0.691365	0.837587	0.920571	0.5435	0.6591	0.7204	0.7022	1.0306	1.5133	0.345079	0.418476	0.457397	0.5444	0.6596	0.7249	0.8898	0.7994	1.2258	0.345651	0.418794	0.460254	40.6303	39.2414	42.9825	41.0714	39.9417	42.9639	18.2283	20.7877	13.7845	18.3986	20.8607	14.411
10	3	113	118	130	1.1111	1.25	1.5278	0.743211	0.83612	1.02194	1.1719	1.2433	1.3865	1.92345	1.50758	1.11337	0.78388	0.831639	0.927425	0.587	0.6231	0.6945	0.9603	0.9484	0.6278	0.392642	0.416789	0.464548	0.5859	0.6216	0.6932	1.0143	0.7498	0.5052	0.391906	0.415786	0.463679	40.0631	40.6636	42.2548	40.9608	41.5313	42.5161	19.0536	17.9012	15.3071	18.8644	17.6698	15.1237
11	3	107	124	137	1.1111	1.3333	1.6667	0.735828	0.88298	1.10377	1.2183	1.2882	1.4364	2.79211	2.42016	1.62736	0.806821	0.853113	0.951258	0.6119	0.6431	0.7174	1.9535	0.973	0.6894	0.405232	0.425894	0.475099	0.6091	0.6441	0.7182	1.5307	1.1691	0.7012	0.403377	0.426556	0.475629	38.4565	39.9522	42.5554	39.3485	40.5255	43.038	22.3735	19.4577	14.3611	21.9196	19.6172	14.4667
12	3	103	118	131	1.1667	1.4167	1.6667	0.745972	0.905818	1.06566	1.3436	1.4244	1.5067	2.50247	1.42963	1.32743	0.859079	0.910742	0.963363	0.6708	0.7128	0.755	1.3385	0.6492	0.6782	0.4289	0.455754	0.482737	0.6718	0.7122	0.7533	1.441	0.7187	0.6	0.42954	0.455371	0.48165	39.8551	40.5601	41.5011	40.7381	41.6817	42.5885	19.3478	17.7958	16.0044	19.4928	17.7055	15.7837
13	3	108	122	126	1.1111	1.3333	1.4167	0.740733	0.888867	0.944467	1.2659	1.2995	1.3328	4.43185	0.953676	1.13884	0.843933	0.866333	0.888533	0.6298	0.6508	0.6664	2.2647	0.8444	0.6032	0.419867	0.433867	0.444267	0.6329	0.6497	0.6664	2.5246	0.4647	0.5357	0.421933	0.433133	0.444267	40.0756	41.1348	41.7825	40.5643	41.5943	42.2731	19.1556	17.3365	15.9444	19.6597	17.1789	15.9444
14	3	106	116	149	1.0556	1.25	1.8056	0.69129	0.818599	1.18245	1.1973	1.3144	1.4428	2.48731	2.29477	1.55155	0.784086	0.860773	0.944859	0.5975	0.6563	0.7198	1.2981	0.9199	0.71	0.39129	0.429797	0.471382	0.5987	0.6572	0.7214	1.4106	1.2065	0.6199	0.392076	0.430386	0.47243	40.4416	41.685	43.1015	37.4685	38.6979	41.6382	22.0189	19.5604	15.1653	22.2082	19.707	15.3934
15	3	105	114	121	0.75	1.1111	1.3333	0.465839	0.690124	0.828137	0.8618	1.1683	1.34	2.89139	2.63799	1.54683	0.53528	0.725652	0.832298	0.4304	0.5849	0.6683	1.5729	1.0927	0.6495	0.267329	0.363292	0.415093	0.4309	0.5841	0.67	1.6612	1.3869	0.7773	0.26764	0.362795	0.416149	40.4564	40.1628	41.2303	38.8728	39.9457	41.6252	20.6224	19.9457	17.0407	20.7469	19.81	17.2901
16	3	97	119	129	0.8056	1	1.1667	0.511817	0.635324	0.741233	0.9761	1.0017	1.0718	3.07888	2.18848	2.69197	0.62014	0.636404	0.68094	0.4876	0.5	0.5355	1.62	1.5366	1.2138	0.309784	0.317662	0.340216	0.488	0.5008	0.5359	1.8653	1.0961	1.2365	0.310038	0.31817	0.34047	36.2552	37.1111	38.1264	35.7176	37.0494	38.3164	27.9945	25.7778	23.5294	28.0863	25.9444	23.602
17	3	102	120	133	0.8333	1.1667	1.5556	0.535884	0.750289	1.00039	0.9903	1.1853	1.3786	3.7918	2.07403	2.0293	0.636849	0.762251	0.886559	0.4948	0.5909	0.6874	2.5668	1.1843	0.348	0.318199	0.38	0.442058	0.4951	0.5927	0.6893	2.2531	1.0536	0.8992	0.318392	0.381158	0.44328	39.0175	41.0661	42.1499	38.4993	39.8622	42.7362	22.4561	18.9536	14.9929	22.5263	19.2498	15.2758
18	3	100	116	150	0.9444	1.1667	1.75	0.640271	0.790983	1.18644	1.1239	1.2107	1.4175	2.81211	3.33136	1.23457	0.761966	0.820814	0.961017	0.5596	0.6067	0.7077	2.136	1.7321	0.5266	0.37939	0.411322	0.479797	0.5619	0.6054	0.7088	1.6733	1.7285	0.5	0.380949	0.410441	0.480542	38.0591	38.9957	41.1128	37.1429	38.4368	40.5864	24.6414	22.6496	18.238	25.0633	22.4359	18.3926
19	3	100	100	112	1.0833	1.1667	1.5556	0.677062	0.729187	0.97225	1.3108	1.3942	1.6644	2.51354	2.86847	2.53098	0.81925	0.871375	1.04025	0.6629	0.7015	0.8374	2.5241	2.1028	1.1426	0.414313	0.438437	0.523375	0.6554	0.6971	0.8322	1.5207	1.7139	1.354	0.409625	0.435688	0.520125	39.1216	39.8129	41.9505	40.7025	41.0042	43.3022	20.6333	19.4387	15.0155	19.5097	18.815	14.3963
20	3	100	114	125	0.9444	1.0833	1.2778	0.601529	0.69	0.813885	1.1471	1.1603	1.2465	3.73775	1.97838	2.51613	0.730637	0.739045	0.793949	0.5714	0.5812	0.6268	1.7451	1.45	1.6906	0.363949	0.370191	0.399236	0.5735	0.5801	0.6233	2.27	1.0595	1.2273	0.365287	0.36949	0.397006	36.9647	38.6766	40.2039	38.9222	39.5892	41.1162	23.9669	21.808	18.9128	24.3426	21.6216	18.3465
21	3	108	125	133	1.0833	1.2778	1.5556	0.734441	0.866305	1.05464	1.1929	1.2465	1.4044	1.98243	1.45863	1.74778	0.808746	0.845085	0.952136	0.597	0.6219	0.7044	1.0482	0.7454	0.6468	0.404746	0.421627	0.477559	0.5964	0.6233	0.7022	1.0915	0.7115	0.789	0.404339	0.422576	0.476068	39.6169	40.2968	42.1136	37.7397	39.6355	41.2975	22.6815	19.9772	16.7192	22.5806	20.2055	16.4038
22	3	98	118	131	0.6944	0.9444	1.1667	0.464482	0.631706	0.780401	0.8631	0.9649	1.0797	6.11532	3.21736	2.77849	0.577324	0.645418	0.722207	0.4308	0.4813	0.5393	3.8797	1.5201	1.194	0.288161	0.32194	0.360736	0.4315	0.4825	0.5398	3.8005	1.6436	1.2857	0.288629	0.322742	0.36107	35.2907	37.6942	38.4464	37.0115	37.602	39.7839	27.6339	24.6116	21.7306	27.8066	24.8569	21.8289
23	3	116	121	145	0.9444	1.1667	1.5556	0.654017	0.807964	1.07729	0.9909	1.133	1.2721	3.05031	3.30816	2.06064	0.686219	0.784626	0.880956	0.495	0.5684	0.6352	1.4977	1.4928	0.7817	0.342798	0.393629	0.439889	0.4954	0.5665	0.636	1.6002	1.6063	0.8425	0.343075	0.392313	0.440443	38.4738	40.0228	42.585	37.8872	39.8169	42.2554	23.6089	20.2965	15.102	23.6884	19.9544	15.2381
24	3	129	134	138	1.1667	1.1667	1.5556	0.786186	0.786186	1.04825	1.0882	1.0542	1.3412	3.20312	2.63896	2.10189	0.733288	0.710377	0.903774	0.5441	0.5277	0.6715	0.9791	1.0305	0.7071	0.366644	0.355593	0.452493	0.5441	0.5271	0.6706	1.4938	1.1923	0.9061	0.366644	0.355189	0.451887	41.3255	42.1106	42.5997	41.1306	41.5493	42.9124	17.5439	16.3819	14.5431	17.5439	16.2814	14.4144
25	3	92	100	131	0.6944	0.7778	1.2778	0.480554	0.53827	0.884291	0.9119	0.9301	1.1699	1.34852	3.68428	2.19123	0.631073	0.643668	0.809619	0.4543	0.4663	0.5835	1.6967	2.0762	0.8819	0.314394	0.322699	0.403806	0.4559	0.465	0.5849	0.8855	2.2028	1.0031	0.315502	0.321799	0.404775	38.7419	38.082	41.8491	37.9613	38.9547	42.4757	23.1628	23.0716	15.5718	23.5156	22.7936	15.8151
26	3	120	120	145	1	1	1.3889	0.633714	0.633714	0.880165	1.0136	1.0125	1.1728	1.41239	1.46074	1.86095	0.642332	0.641635	0.743219	0.5055	0.505	0.5872	0.8648	0.7638	0.9461	0.320342	0.320025	0.372117	0.5068	0.5063	0.5864	0.7158	0.7395	0.7857	0.321166	0.320849	0.37161	38.3094	37.9538	40.8673	36.5919	37.9424	41.8421	25	24.0099	17.3456	25.2698	24.2574	17.2142
27	3	106	108	124	1	1	1.3889	0.648088	0.648088	0.90013	1.128	1.114	1.3333	1.625	2.09372	2.20976	0.731043	0.72197	0.864096	0.5645	0.556	0.6641	1.0595	1.0677	1.2732	0.365846	0.360337	0.430395	0.564	0.557	0.6667	0.9165	1.1662	1.0607	0.365522	0.360985	0.43208	36.8468	38.2194	41.3072	37.9433	38.1508	40.8854	25.2436	23.5612	17.6471	25.155	23.741	18.0392
28	3	98	136	147	0.7778	1.1667	1.5556	0.511711	0.767566	1.02342	0.9476	1.0479	1.241	4.07434	2.0594	2.62785	0.623421	0.689408	0.816447	0.4783	0.5255	0.6231	2.2913	1.0966	0.9558	0.314671	0.345724	0.409934	0.4738	0.5239	0.6205	2.4819	0.9249	1.0482	0.311711	0.344671	0.408224	36.0434	38.7487	40.4993	37.2777	39.6761	41.6435	27.0325	21.6953	18.0305	26.084	21.3925	17.6144
29	3	96	96	133	0.8889	0.9444	1.3889	0.566178	0.601529	0.88465	1.0996	1.1858	1.276	4.09091	2.02571	2.6904	0.700382	0.755287	0.812739	0.5502	0.594	0.6372	1.9468	1.2644	1.0825	0.350446	0.378344	0.40586	0.5498	0.5929	0.638	2.5303	1.2717	1.2359	0.350191	0.377643	0.406369	35.3796	35.3357	38.5559	37.8335	37.8761	40.1361	26.8174	26.8551	21.2534	26.7367	26.6784	21.3896
30	3	120	129	150	1.1667	1.2778	1.5556	0.796382	0.872218	1.06184	1.1667	1.1973	1.2483	3.3764	1.58655	2.39303	0.796382	0.81727	0.852082	0.5793	0.5993	0.6281	1.831	0.7	0.8197	0.395427	0.409078	0.428737	0.5833	0.5986	0.6242	1.6882	0.7433	0.9601	0.398157	0.408601	0.426075	41.1883	40.6183	42.7245	39.2	40.9819	42.2118	19.3353	18.4435	15.3251	20.0403	18.3369	14.7059
31	3	102	109	125	1.0833	1.2778	1.75	0.712697	0.840658	1.15132	1.319	1.3946	1.6538	2.48945	2.42064	1.7008	0.867763	0.9175	1.08803	0.6656	0.6937	0.8254	1.9274	1.4106	0.986	0.437895	0.456382	0.543026	0.6595	0.6973	0.8269	1.5155	1.321	0.8036	0.433882	0.45875	0.544013	38.1485	40.6579	42.9329	38.7064	39.6597	41.7989	23.4995	19.4737	15.1943	22.5839	20	15.371
32	3	100	116	131	0.9444	1.1667	1.3889	0.59546	0.735624	0.875725	1.1466	1.2276	1.2948	3.84918	4.02662	2.00858	0.722951	0.774023	0.816393	0.5695	0.6131	0.6458	2.4	2.2906	1.0801	0.359079	0.38657	0.407188	0.5733	0.6138	0.6474	2.3367	2.1184	0.9362	0.361475	0.387011	0.408197	37.3134	38.7949	39.6655	39.8682	40.5491	41.7163	22.5539	20.6131	18.5185	23.2172	20.7188	18.7575
33	3	112	121	132	0.9444	1.0833	1.3889	0.654924	0.751248	0.963176	1.0054	1.105	1.2813	3.43061	2.70266	2.40871	0.697226	0.766297	0.888558	0.501	0.5514	0.6398	2.1369	1.2806	1.0735	0.347434	0.382386	0.443689	0.5027	0.5525	0.6406	1.8261	1.3784	1.111	0.348613	0.383148	0.444244	37.5321	38.998	40.5699	38.7703	39.8039	42.4119	23.5647	21.1198	16.9607	23.9075	21.3163	17.0963
34	3	110	119	137	1	1.1667	1.3889	0.671141	0.78302	0.932148	1.123	1.1719	1.233	1.59546	1.82437	2.47805	0.753691	0.78651	0.827517	0.5625	0.5846	0.6173	1.0782	0.9655	1.0657	0.377517	0.392349	0.414295	0.5615	0.5859	0.6165	0.8958	0.9162	1.0999	0.376846	0.393221	0.413758	36.8	38.4701	40	37.4889	38.385	40.0501	25.7778	23.0599	20	25.6	23.2816	19.875
35	3	112	129	147	0.8889	1.2778	1.75	0.590239	0.848473	1.16202	0.9474	1.167	1.4022	1.60047	1.78804	1.58326	0.629084	0.7749	0.931076	0.4741	0.5842	0.6989	1.0672	0.7857	0.6343	0.314807	0.387915	0.464077	0.4737	0.5835	0.7011	0.8529	0.8165	0.6343	0.314542	0.38745	0.465538	39.2188	41.7983	43.5055	39.5622	41.8491	43.3697	21.25	16.4034	12.989	21.1719	16.2819	13.302
36	3	132	139	144	1.3889	1.5556	1.75	0.905411	1.01408	1.14081	1.2716	1.3456	1.4425	0.748079	1.00115	1.42912	0.828944	0.877184	0.940352	0.6366	0.6738	0.7175	0.4082	0.4961	0.5976	0.414993	0.439244	0.467731	0.6358	0.6728	0.7213	0.3425	0.433	0.589	0.414472	0.438592	0.470209	41.5758	42.1356	42.8571	41.5049	42.4855	42.9809	16.9697	15.4401	13.9373	16.8485	15.2958	14.4599
37	3	90	106	125	0.7778	1	1.3889	0.49859	0.641026	0.890321	1.0649	1.143	1.3229	3.05868	2.87655	3.30967	0.682628	0.732692	0.848013	0.5342	0.5715	0.6597	2.4052	1.831	1.4361	0.342436	0.366346	0.422885	0.5324	0.5715	0.6615	2.0939	1.6439	1.5762	0.341282	0.366346	0.424038	37.1277	38.8451	41.3158	39.1766	39.895	41.7323	23.8253	21.2598	16.8421	23.4944	21.2598	17.1053
38	3	101	112	120	0.9444	1.25	1.4167	0.642449	0.85034	0.963741	1.1233	1.349	1.4025	2.4457	1.47461	3.32472	0.76415	0.917687	0.954082	0.5607	0.6731	0.6977	1.7365	0.6617	1.5207	0.381429	0.457891	0.474626	0.5616	0.6745	0.7013	1.4545	0.7957	1.6457	0.382041	0.458844	0.477075	39.023	41.7857	41.709	40.0224	41.5538	41.5825	20.8871	16.5714	16.4975	21.0556	16.7857	17.0051
39	3	87	103	133	0.8333	1.0556	1.5278	0.555533	0.703733	1.01853	1.1489	1.2373	1.3648	5.83179	3.30706	2.97343	0.765933	0.824867	0.909867	0.5683	0.6149	0.6862	3.6959	1.25	1.8578	0.378867	0.409933	0.457467	0.5744	0.6186	0.6824	4.0202	1.9381	1.3281	0.382933	0.4124	0.454933	38.4164	38.6266	39.9814	36.5571	37.599	40.7649	24.6334	23.5438	19.4805	25.7087	24.157	18.9239
40	3	129	124	136	0.7778	0.9167	1.1111	0.524124	0.617722	0.74872	0.7279	0.887	0.9648	3.29232	3.31304	3.35207	0.490499	0.597709	0.650135	0.3636	0.4439	0.4812	1.4577	1.6423	1.3032	0.245013	0.299124	0.324259	0.3639	0.4435	0.4824	1.5405	1.6029	1.4554	0.245216	0.298854	0.325067	37.4777	37.8073	40.2181	35.5298	36.122	37.7479	26.9608	26.1062	21.9371	27.0499	26.0079	22.1937
41	3	114	104	120	1.25	1.25	1.4167	0.841751	0.841751	0.954007	1.3269	1.4396	1.4167	2.41861	1.53836	2.2563	0.893535	0.969428	0.954007	0.6639	0.7214	0.7096	1.1628	0.8281	1.1245	0.447071	0.485791	0.477845	0.6635	0.7198	0.7083	1.2837	0.8858	1.1282	0.446801	0.484714	0.47697	39.971	40.5054	41.833	41.3768	41.534	42.0909	18.6821	18.0505	16.1525	18.6097	17.8339	15.971
42	3	101	128	149	0.9167	1.1667	1.6667	0.611133	0.7778	1.11113	1.0948	1.0936	1.3449	4.06955	1.71879	1.40757	0.729867	0.729067	0.8966	0.5468	0.5472	0.6737	1.809	0.8602	0.6154	0.364533	0.3648	0.449133	0.5474	0.5468	0.6724	2.4301	0.8055	0.5679	0.364933	0.364533	0.448267	38.5018	40.5828	42.5309	39.6651	41.0384	43.2793	21.7915	18.408	14.2721	21.8963	18.3369	14.0818
43	3	112	118	128	1.1111	1.25	1.5278	0.710877	0.799744	0.977479	1.2095	1.2673	1.4272	2.66379	1.87702	2.16131	0.773832	0.810813	0.913116	0.606	0.6322	0.7136	1.6846	1.0714	1.0889	0.387716	0.404479	0.456558	0.6048	0.6337	0.7136	1.4498	0.9515	1.0095	0.386948	0.405438	0.456558	39.4237	40.1521	40.678	37.8609	39.7572	41.2132	22.7898	20	18.1088	22.5933	20.2281	18.1088
44	3	108	114	118	1.0556	1.1667	1.3333	0.699073	0.772649	0.88298	1.1731	1.2225	1.3436	1.79572	1.81003	0.883574	0.776887	0.809603	0.889801	0.5865	0.6117	0.6728	1.1813	0.6227	0.6032	0.388411	0.405099	0.445563	0.5865	0.6113	0.6718	0.9978	0.9483	0.4452	0.388411	0.404834	0.444901	41.0318	41.9619	42.378	39.4721	40.15	41.2214	19.4961	17.9155	16.4634	19.4961	17.8474	16.311
45	3	96	107	122	0.9444	1.1111	1.4167	0.632976	0.744705	0.949531	1.1711	1.2333	1.3919	2.11169	2.06049	1.38596	0.78492	0.826609	0.932909	0.5856	0.6179	0.6948	1.842	1.1121	0.877	0.392493	0.414142	0.465684	0.5856	0.6167	0.6959	1.3093	1.1435	0.6808	0.392493	0.413338	0.466421	39.2857	40.0415	41.8012	38.3065	39.2931	40.8821	22.4078	20.7469	17.2472	22.4078	20.5394	17.4172
46	3	102	116	133	1.0556	1.1667	1.6667	0.683236	0.755146	1.07877	1.2305	1.21	1.4894	1.79696	2.04307	1.67162	0.79644	0.783172	0.964013	0.616	0.6063	0.7447	1.2597	1.1254	0.6492	0.398706	0.392427	0.482006	0.6152	0.605	0.7447	1.0474	1.0595	0.7469	0.398188	0.391586	0.482006	39.6573	40.5498	42.0142	40.4412	41.7355	42.9298	19.951	17.8007	15.056	19.8286	17.5945	15.056
47	3	107	127	128	0.9167	1	1.1667	0.583885	0.636943	0.743121	1.0342	0.9328	1.0842	1.85521	1.74357	1.9035	0.658726	0.59414	0.690573	0.5182	0.4669	0.5417	1.2184	0.7663	0.7717	0.330064	0.297389	0.345032	0.5171	0.4664	0.5421	1.0465	0.8132	0.8844	0.329363	0.29707	0.345287	40.1145	41.2255	41.565	40.1981	41.6319	42.109	19.7711	17.1921	16.2958	19.563	17.0732	16.3676
48	3	96	102	115	0.9444	1.0833	1.3889	0.640271	0.734441	0.941627	1.1909	1.2627	1.4722	2.95548	2.3272	1.05474	0.80739	0.856068	0.998102	0.5969	0.6344	0.7378	1.6912	1.4803	0.857	0.404678	0.430102	0.500203	0.5955	0.6313	0.7361	1.8635	1.3563	0.559	0.403729	0.428	0.499051	37.8956	38.7097	40.5882	38.858	40.4194	41.1557	23.3386	21.0626	18.3529	23.1013	20.5882	18.1176
49	3	82	91	101	0.5833	0.6389	0.8333	0.401169	0.439409	0.573109	0.8688	0.8315	0.9743	8.30249	5.2021	4.69053	0.597524	0.571871	0.670083	0.4313	0.4157	0.4882	5.858	3.5999	2.6758	0.29663	0.285901	0.335763	0.4344	0.4157	0.4872	6.1831	3.3851	2.7421	0.298762	0.285901	0.335076	37.8744	35.6751	36.8421	34.7242	35.5104	37.7049	27.1498	28.8145	25.5334	27.8744	28.8145	25.3201
50	3	100	124	140	0.8333	1.1667	1.5556	0.56803	0.795297	1.0604	1.0035	1.1503	1.36	3.54678	1.82566	2.01462	0.684049	0.784117	0.927062	0.4983	0.5758	0.6778	2.116	1.3973	0.4165	0.339673	0.392502	0.462031	0.5017	0.5752	0.68	2.1356	0.9	0.8806	0.34199	0.392093	0.463531	38.6063	39.5137	41.6393	38.0623	39.7566	42.3203	23.0662	20.77	15.9016	23.7631	20.6687	16.2295
51	3	102	109	135	0.8889	1	1.3889	0.569808	0.641026	0.890321	1.0642	1.0773	1.2438	4.36339	3.16866	1.30124	0.682179	0.690577	0.797308	0.5341	0.5409	0.6219	3.5472	2.2645	0.6713	0.342372	0.346731	0.398654	0.5321	0.5386	0.6219	2.612	1.7068	0.5827	0.34109	0.345256	0.398654	36.233	39.1597	41.4392	37.9651	37.8903	40.4467	25.9455	23.1092	18.1141	25.5673	22.6891	18.1141
52	3	100	117	136	1	1.1667	1.5556	0.64433	0.75174	1.00232	1.203	1.1492	1.3572	3.40815	2.91604	3.79066	0.775129	0.740464	0.874485	0.6045	0.5758	0.6835	2.1731	1.45	1.7755	0.389497	0.371005	0.440399	0.6015	0.5746	0.6786	2.05	1.4361	1.6536	0.387564	0.370232	0.437242	38.2961	40.3242	40.9673	40.6484	40.7107	43.1232	21.2572	19.0476	16.2162	20.761	18.845	15.505
53	3	94	124	143	0.8333	1.2778	1.75	0.534167	0.819103	1.12179	1.0523	1.2437	1.5025	6.05055	2.65279	3.49022	0.674551	0.797244	0.963141	0.5205	0.6211	0.7513	4.8169	1.1249	1.321	0.333654	0.398141	0.481603	0.5261	0.6219	0.7513	3.8204	1.291	1.4983	0.337244	0.398654	0.481603	36.8268	39.4286	41.5973	36.7171	39.3836	41.4309	26.0553	21.1429	16.9717	27.147	21.2571	16.9717
54	3	98	114	131	0.7778	0.9444	1.1667	0.518533	0.6296	0.7778	0.9599	0.996	1.0873	3.28241	3.2688	3.86289	0.639933	0.664	0.724867	0.479	0.495	0.5413	1.7058	0.8207	1.546	0.319333	0.33	0.360867	0.48	0.498	0.5437	2.0255	1.7237	1.8	0.32	0.332	0.362467	37.2124	38.9419	39.8707	37.6772	38.1897	40.2361	25.0338	22.6366	19.7198	25.2368	23.2437	20.1509
[truncated: 39 more columns]
